# Supplementary material
Source: MDPI journal article supplement (https://www.mdpi.com/2073-4395/12/5/1230)
Supplement: s1 [file s1]

**Table S1.** Myanmar rice materials.

| No. | Varieties        | Ecosystem | No. | Varieties            | Ecosystem |
|-----|------------------|-----------|-----|----------------------|-----------|
| 1   | Ayarmin          | Lowland   | 12  | Yeanelo - 6          | Lowland   |
| 2   | Manaw Thukha     | Lowland   | 13  | Yeanelo - 7          | Lowland   |
| 3   | Myaung Mya May   | Lowland   | 14  | Y329-UBN (Thai-land) | Lowland   |
| 4   | Pyi Myanmar Sein | Lowland   | 15  | Ba Ma Htar           | Upland    |
| 5   | Shwe Asian       | Lowland   | 16  | Kauk Yin             | Upland    |
| 6   | Sin Thwe Lat     | Lowland   | 17  | Ma Ma Lay Saba       | Upland    |
| 7   | Yeanelo - 1      | Lowland   | 18  | Nga Ywan Nu          | Upland    |
| 8   | Yeanelo - 2      | Lowland   | 19  | Yar - 4              | Upland    |
| 9   | Yeanelo - 3      | Lowland   | 20  | Yar - 8              | Upland    |
| 10  | Yeanelo - 4      | Lowland   | 21  | Yar Kyaw             | Upland    |
| 11  | Yeanelo - 5      | Lowland   |     |                      |           |

**Table S2.** Principal component analysis of lowland rice under drought stress in field experiment.

| Traits      | Dim.1 | Dim.2 | Dim.3 | Dim.4 |
|-------------|-------|-------|-------|-------|
| FD          | -0.53 | 0.32  | -0.75 | -0.05 |
| PH          | 0.84  | -0.34 | 0.25  | 0.26  |
| TN          | -0.48 | -0.82 | -0.09 | -0.30 |
| BW          | 0.47  | -0.86 | -0.16 | 0.13  |
| GW          | 0.23  | 0.34  | 0.88  | 0.21  |
| FG          | 0.18  | -0.91 | 0.12  | -0.31 |
| NPT         | 0.83  | -0.47 | -0.28 | 0.06  |
| NR          | 0.53  | -0.80 | -0.25 | 0.04  |
| LR          | -0.66 | 0.17  | 0.14  | -0.72 |
| RT          | 0.93  | 0.20  | -0.05 | -0.28 |
| CA          | 0.90  | 0.24  | 0.01  | -0.33 |
| SA          | 0.78  | 0.50  | 0.12  | -0.27 |
| XN          | 0.57  | 0.33  | -0.42 | -0.60 |
| XA          | 0.72  | 0.64  | -0.13 | 0.10  |
| PA          | 0.10  | 0.38  | -0.70 | 0.50  |
| Eigen value | 6.05  | 4.48  | 2.31  | 1.73  |
| %variance   | 40.36 | 29.86 | 15.37 | 11.51 |
| %Cum.Var    | 40.36 | 70.22 | 85.60 | 97.11 |

FD, 50% days to flowering (DAS); PH, plant height (cm); TN, tiller number (number); FG, percent of filled grain (%); 1000GW, one thousand grain weight; BIO, biomass (g); NPT, nodal root per tiller (no./tiller); NR, total nodal root number (no.); LR, lateral root density (no./10 cm); RT, root thickness (mm); CA, cortex area (cm<sup>2</sup>); SA, stele area (cm<sup>2</sup>); XN, xylem number (no.); XA, xylem area (cm<sup>2</sup>); PA, percent of aerenchyma (%).

**Table S3.** Principal component analysis of upland rice under drought stress in field experiment.

| Traits      | Dim.1 | Dim.2 | Dim.3 | Dim.4 |
|-------------|-------|-------|-------|-------|
| FD          | 0.80  | 0.40  | 0.22  | 0.38  |
| PH          | -0.22 | 0.69  | -0.50 | 0.17  |
| TN          | -0.32 | -0.86 | 0.03  | 0.34  |
| BW          | 0.12  | -0.32 | -0.19 | 0.90  |
| GW          | 0.80  | 0.40  | 0.23  | 0.37  |
| FG          | 0.80  | 0.40  | 0.26  | 0.35  |
| NPT         | 0.42  | -0.46 | -0.44 | -0.46 |
| NR          | 0.03  | -0.77 | -0.45 | 0.21  |
| LR          | -0.77 | -0.14 | 0.54  | 0.12  |
| RT          | -0.91 | 0.36  | -0.10 | 0.13  |
| CA          | -0.82 | 0.42  | -0.15 | 0.32  |
| SA          | -0.71 | 0.62  | -0.20 | 0.25  |
| XN          | -0.08 | 0.84  | 0.25  | -0.37 |
| XA          | -0.10 | -0.15 | 0.89  | -0.03 |
| PA          | -0.46 | -0.49 | 0.62  | 0.07  |
| Eigen value | 5.08  | 4.28  | 2.44  | 1.95  |

|           |       |       |       |       |
|-----------|-------|-------|-------|-------|
| %variance | 33.88 | 28.53 | 16.29 | 13.03 |
| %Cum.Var  | 33.88 | 62.41 | 78.70 | 91.73 |

FD, 50% days to flowering (DAS); PH, plant height (cm); TN, tiller number (number); FG, percent of filled grain (%); 1000GW, one thousand grain weight; BIO, biomass (g); NPT, nodal root per tiller (no./tiller); NR, total nodal root number (no.); LR, lateral root density (no./10 cm); RT, root thickness (mm); CA, cortex area (cm<sup>2</sup>); SA, stele area (cm<sup>2</sup>); XN, xylem number (no.); XA, xylem area (cm<sup>2</sup>); PA, percent of aerenchyma (%).

**Table S4.** Principal component analysis of lowland rice under drought stress in pot experiment.

| Traits      | Dim.1 | Dim.2 | Dim.3 | Dim.4 |
|-------------|-------|-------|-------|-------|
| PH          | -0.17 | 0.68  | -0.04 | -0.64 |
| TN          | -0.92 | -0.03 | 0.24  | 0.04  |
| BM          | -0.78 | 0.50  | -0.13 | 0.10  |
| NPT         | -0.15 | 0.75  | -0.32 | 0.44  |
| NR          | -0.92 | 0.24  | 0.00  | 0.18  |
| LR          | -0.18 | 0.10  | 0.74  | 0.05  |
| %50-90      | 0.67  | -0.04 | -0.34 | 0.51  |
| CC          | 0.34  | 0.00  | -0.56 | -0.44 |
| PR          | 0.82  | 0.33  | 0.20  | 0.09  |
| SC          | 0.84  | 0.37  | 0.27  | -0.03 |
| TR          | 0.84  | 0.32  | 0.27  | 0.00  |
| Eigen value | 5.06  | 1.69  | 1.35  | 1.11  |
| %variance   | 45.97 | 15.39 | 12.30 | 10.08 |
| %Cum.Var    | 45.97 | 61.36 | 73.66 | 83.74 |

PH, plant height (cm); TN, tiller number (number); BIO, biomass (g); NPT, nodal root per tiller (no./tiller); NR, total nodal root number (no.); LR, lateral root density (no./10 cm); %50-90; percent of nodal root at 50-90 degree (%), CC, chlorophyll content (nmol cm<sup>-2</sup>); PR, photosynthesis rate (CO<sub>2</sub> m<sup>-2</sup>s<sup>-1</sup>); SC, stomatal conductance (mmol m<sup>-2</sup>s<sup>-1</sup>); TR, transpiration rate (mm min<sup>-1</sup>).

**Table S5.** Principal component analysis of upland rice under drought stress in pot experiment.

| Traits      | Dim.1 | Dim.2 | Dim.3 |
|-------------|-------|-------|-------|
| PH          | -0.56 | -0.66 | -0.41 |
| TN          | -0.86 | 0.18  | -0.36 |
| BM          | -0.94 | -0.17 | 0.03  |
| NPT         | -0.91 | -0.09 | 0.37  |
| NR          | -0.98 | -0.01 | 0.03  |
| LRD         | -0.01 | 0.99  | 0.03  |
| %50-90      | 0.91  | 0.13  | 0.03  |
| CC          | 0.26  | 0.85  | 0.06  |
| PR          | -0.04 | -0.42 | 0.90  |
| SC          | 0.71  | -0.57 | -0.06 |
| TR          | 0.69  | -0.58 | -0.17 |
| Eigen value | 5.61  | 3.06  | 1.28  |
| %variance   | 50.96 | 27.83 | 11.65 |
| %Cum.Var    | 50.96 | 78.79 | 90.44 |

PH, plant height (cm); TN, tiller number (number); BIO, biomass (g); NPT, nodal root per tiller (no./tiller); NR, total nodal root number (no.); LR, lateral root density (no./10 cm); %50-90; percent of nodal root at 50-90 degree (%), CC, chlorophyll content (nmol cm<sup>-2</sup>); PR, photosynthesis rate (CO<sub>2</sub> m<sup>-2</sup>s<sup>-1</sup>); SC, stomatal conductance (mmol m<sup>-2</sup>s<sup>-1</sup>); TR, transpiration rate (mm min<sup>-1</sup>).

A Field exp.

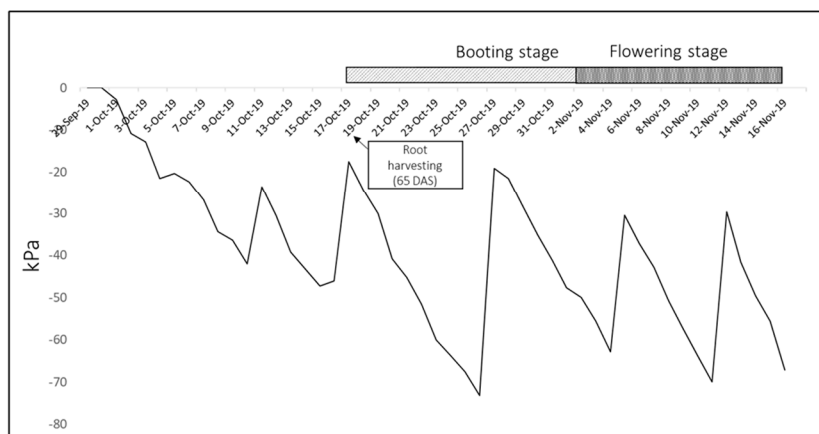

B Pot exp.

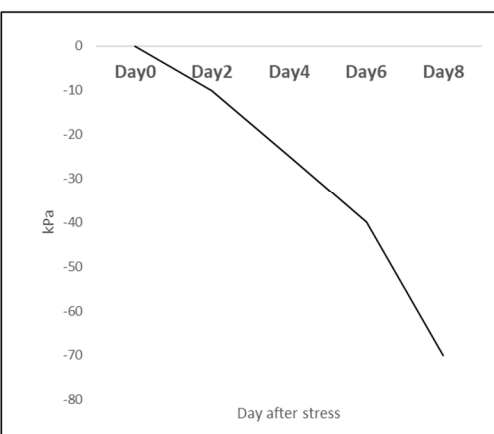

**Figure S1.** Soil water potential monitoring by tensiometer.

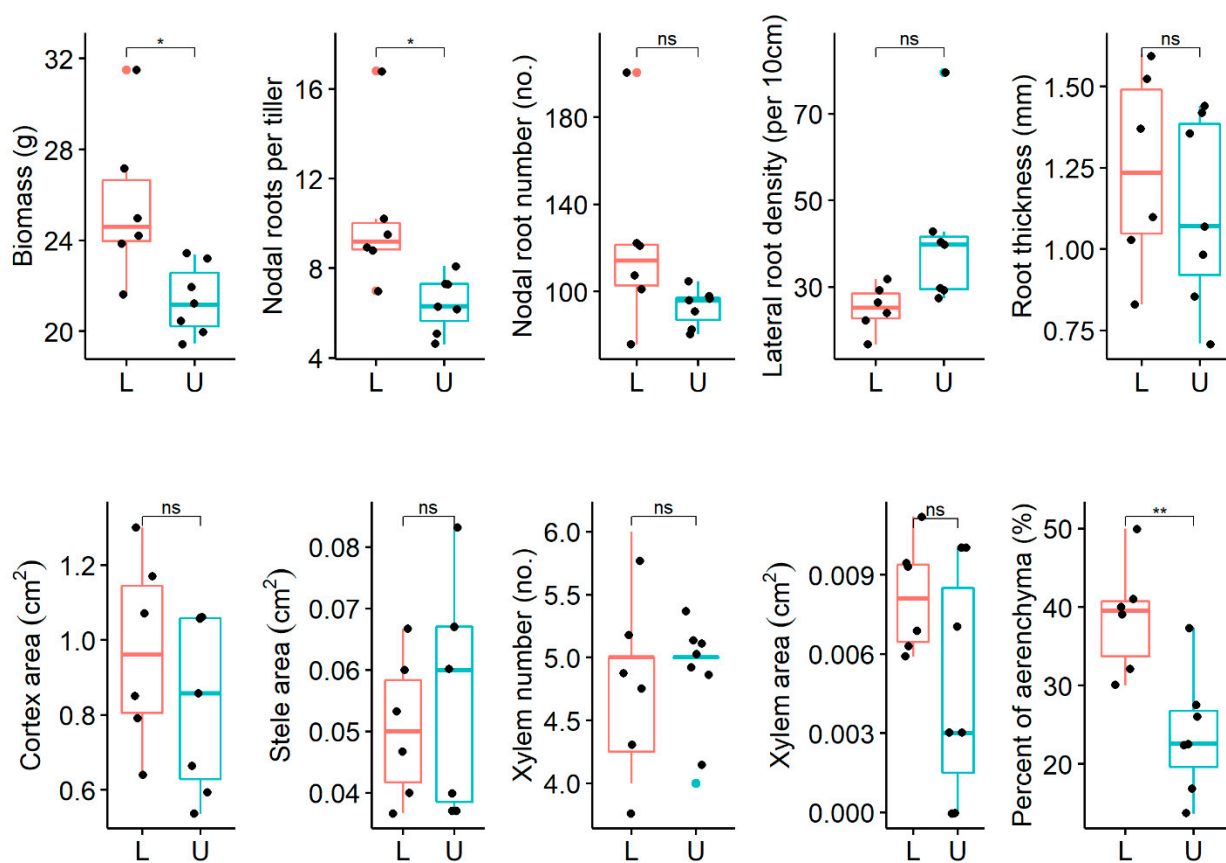

**Figure S2.** Comparison of upland (U) and lowland (L) rice root character under drought stress in field experiment. Note: \*\*, \* and ns represent the significant differences at 0.05, 0.01 levels and no significant difference, respectively.

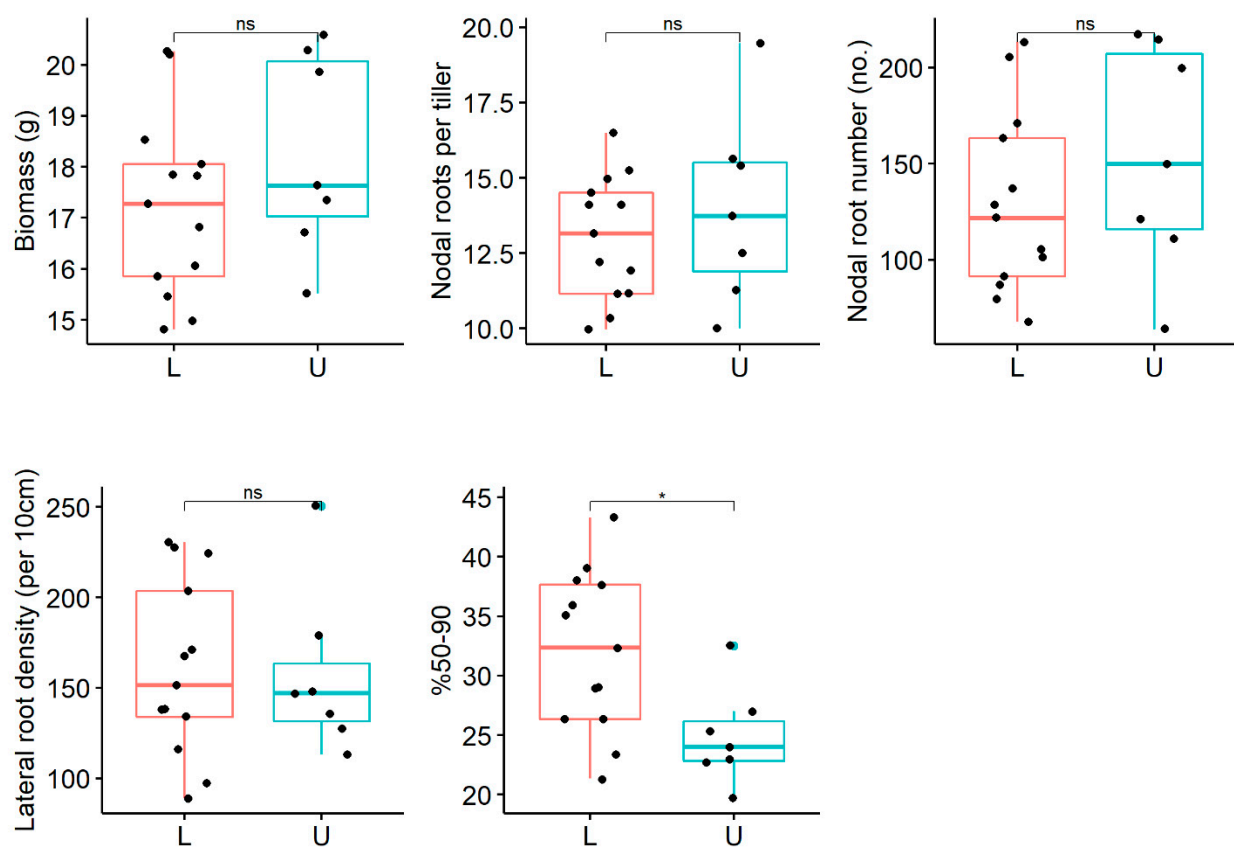

**Figure S3.** Comparison of upland and lowland rice root character under drought stress in pot experiment. Note: \* and ns represent the significant differences at 0.01 levels and no significant difference, respectively.







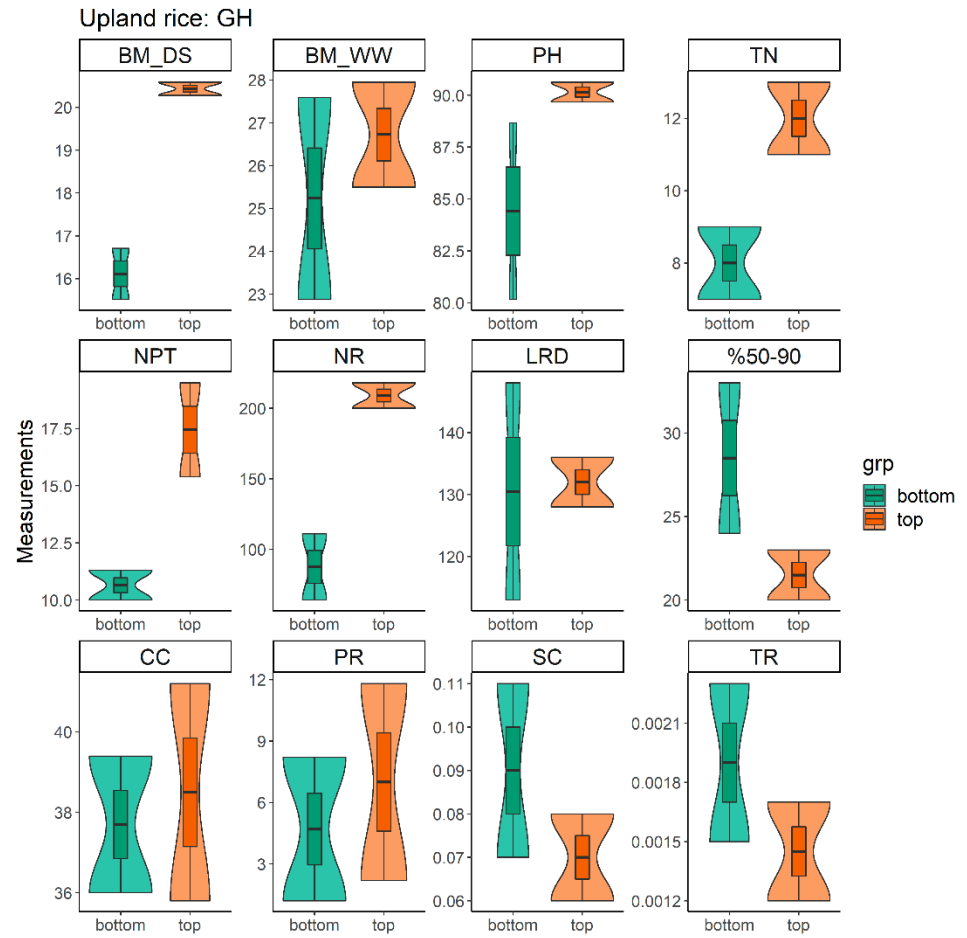

**Figure S7. Bulk analysis of upland rice in pot experiment.** PH, plant height (cm); TN, tiller number (number); BIO, biomass (g); NPT, nodal root per tiller (no./tiller); NR, total nodal root number (no.); LR, lateral root density (no./10 cm); %50-90; percent of nodal root at 50-90 degree (%), CC, chlorophyll content ( $\text{nmol cm}^{-2}$ ); PR, photosynthesis rate ( $\text{CO}_2 \text{ m}^{-2} \text{ s}^{-1}$ ); SC, stomatal conductance ( $\text{mmol m}^{-2} \text{ s}^{-1}$ ); TR, transpiration rate ( $\text{mm min}^{-1}$ ).
